# Supplementary material for: Stretched Gelatin Phantom for Detection of Residual Dipolar Couplings in MR Spectra and Data Analysis of Carnosine
Source: Hindawi journal article supplement (doi:10.1155/2016/4596542), 2016-01-01
Supplement: f1 [file 4596542.f1.doc]

Supplementary Materials

Article title:

Stretched gelatin phantom for detection of residual dipolar couplings in MR spectra and data analysis of carnosine

Authors names:

Bernášek K1, Grocký M1, Burian M2 and Lang J1

1 Department of Low Temperature Physics, Faculty of Mathematics and Physics, Charles University in Prague. V Holešovičkách 2, 180 00 Prague, Czech Republic

2 MR Unit, Department of Diagnostic and Interventional Radiology, Institute for Clinical and Experimental Medicine, Vídeňská 1958/9, 140 21 Prague, Czech Republic

E-mail: Jan.Lang@mff.cuni.cz

Table S1 1H chemical shifts (ppm) of carnosine in isotropic and stretched gelatin.

| Atom | Solution with DSS | 20% gelatin | | 30% gelatin | | 40% gelatin | |
| --- | --- | --- | --- | --- | --- | --- | --- |
| isotropic | stretched | isotropic | stretched | isotropic | stretched |
| Hβ' | 3.2 | 3.2 | 3.2 | 3.2 | 3.2 | 3.2 | 3.2 |
| Hα' | 2.65 | 2.64 | 2.65 | 2.65 | 2.64 | 2.66 | 2.66 |
| Hα | 4.45 | 4.44 | 4.45 | 4.44 | 4.45 | 4.44 | 4.22 |
| HβS | 3.12 | 3.11 | 3.12 | 3.12 | 3.11 | 3.12 | 3.11 |
| HβR | 2.96 | 2.96 | 2.97 | 2.95 | 2.97 | 2.97 | 2.97 |
| H5 | 6.93 | 6.94 | 6.95 | 6.95 | 6.95 | 6.96 | 6.97 |
| H2 | 7.7 | 7.72 | 7.73 | 7.75 | 7.75 | 7.77 | 7.78 |

Table S2 13C chemical shifts (ppm) of carnosine in isotropic and stretched gelatin.

| Atom | Solution with DSS | 20% gelatin | | 30% gelatin | | 40% gelatin | |
| --- | --- | --- | --- | --- | --- | --- | --- |
| isotropic | stretched | isotropic | stretched | isotropic | stretched |
| Cβ' | 38.55 | 38.55 | 38.55 | 38.55 | 38.55 | 38.55 | 38.55 |
| Cα' | 35 | 34.97 | 34.98 | 34.91 | 34.93 | 33.99 | 34.91 |
| Cα | 57.97 | 57.98 | 57.96 | 57.88 | 57.96 | 56.82 | 57.81 |
| Cβ | 31.72 | 31.66 | 31.6 | 31.54 | 31.58 | 30.52 | 31.45 |
| C5 | 120.11 | 120.03 | 120.03 | 119.93 | 119.92 | 118.94 | 119.9 |
| C2 | 138.44 | 138.3 | 138.25 | 138.13 | 138.1 | 137.15 | 138.05 |

Table S3 Measured 1H-13C total coupling in all samples in Hz.

| Atoms | Isotropic solution | 20% gelatin | | 30% gelatin | | 40% gelatin | |
| --- | --- | --- | --- | --- | --- | --- | --- |
| isotropic | stretched | isotropic | stretched | isotropic | stretched |
| Cα-Hα | 142.2 | 142.1 | 167.2 | 144 | 191 | 142 | 176 |
| Cβ-HβS | 131 | 131.1 | 113.25 | 131 | 104 | 125 | 108 |
| Cβ-HβR | 130.5 | 130.3 | 132.9 | 131 | 149 | 126 | 135 |
| Cα'-Hα' | 129.3 | 129.6 | 154.7 | 131 | 166 | 130 | 160 |
| Cβ'-Hβ' | 145.8 | 145.6 | 158.8 | 147 | 169 | 143 | 158 |
| C2-H2 | 208.8 | 209.2 | 206.1 | 209 | 208 | 200 | 202 |
| C5-H5 | 189.8 | 190.5 | 191.4 | 190 | 196 | 186 | 189 |

Table S4 The RMSD, alignment tensor axial (Aa) and rhombic (Ar) components and dihedral angles of histidine (angle 1 C5-C4-Cb-Ca and angle 2 C4-Cb-Ca-N) for 156 conformer from PubChem database CID:9369 [1] and 2 crystal structure [2]. Order of conformers is set by RMSD for 20 % gelatin.

| ID | 20% gelatin | | | 30% gelatin | | | 40% gelatin | | | Dihedral angles | |
| --- | --- | --- | --- | --- | --- | --- | --- | --- | --- | --- | --- |
| RMSD | Aa (x10-4) | Ar (x10-4) | RMSD | Aa (x10-4) | Ar (x10-4) | RMSD | Aa (x10-4) | Ar (x10-4) | angle 1 | angle 2 |
| 126 | 1.5 | 17.6 | 10.2 | 3.4 | 28.0 | 17.4 | 2.1 | 20.9 | 12.9 | -147.5 | -78.2 |
| 71 | 1.6 | 18.8 | 10.9 | 3.8 | 29.5 | 18.3 | 2.1 | 22.3 | 13.7 | -147.5 | 158.2 |
| 117 | 1.6 | 20.0 | 11.7 | 3.9 | 31.4 | 19.6 | 2.1 | 23.7 | 14.6 | -147.5 | -78.2 |
| 16 | 1.7 | 15.6 | 8.5 | 3.7 | 22.2 | 12.6 | 2.2 | 18.3 | 10.4 | 122.5 | -158.2 |
| 20 | 1.9 | 20.1 | 11.7 | 4.5 | 31.1 | 19.4 | 2.4 | 23.9 | 14.7 | -147.6 | -78.2 |
| 36 | 1.9 | 20.6 | 12.1 | 4.5 | 31.9 | 20.0 | 2.4 | 24.5 | 15.2 | -147.6 | 158.2 |
| 145 | 2.0 | 20.4 | 12.0 | 4.6 | 31.6 | 19.7 | 2.5 | 24.3 | 15.0 | -147.5 | -78.1 |
| 57 | 2.0 | 14.5 | 7.7 | 4.0 | 20.6 | 11.4 | 2.5 | 17.1 | 9.4 | 122.5 | -158.2 |
| 98 | 2.0 | 14.3 | 7.5 | 4.0 | 20.2 | 11.2 | 2.5 | 16.7 | 9.2 | 122.5 | -158.2 |
| 148 | 2.1 | 14.0 | 7.4 | 4.2 | 19.8 | 11.0 | 2.6 | 16.4 | 9.0 | 122.4 | 78.1 |
| 34 | 2.1 | 14.0 | 7.4 | 4.2 | 19.8 | 11.0 | 2.7 | 16.4 | 9.1 | 122.4 | 78.2 |
| 124 | 2.3 | 13.7 | 7.2 | 4.4 | 19.3 | 10.7 | 2.9 | 16.0 | 8.8 | 122.5 | 78.2 |
| 146 | 2.3 | 13.1 | 6.7 | 4.5 | 18.4 | 9.9 | 2.9 | 15.3 | 8.2 | 122.5 | -158.2 |
| 134 | 2.4 | 13.2 | 6.8 | 4.5 | 18.5 | 10.2 | 3.0 | 15.4 | 8.4 | 122.4 | 78.2 |
| 65 | 2.4 | 16.4 | 10.1 | 3.6 | 25.2 | 16.5 | 2.5 | 19.7 | 12.5 | 122.4 | 58.2 |
| 120 | 2.4 | 12.8 | 6.5 | 4.6 | 17.9 | 9.8 | 3.0 | 14.9 | 8.1 | 122.5 | -158.1 |
| 111 | 2.5 | 13.0 | 6.6 | 4.8 | 18.2 | 9.7 | 3.2 | 15.2 | 8.1 | 122.4 | -158.2 |
| 90 | 2.9 | 16.5 | 10.3 | 4.3 | 25.4 | 16.6 | 3.2 | 19.8 | 12.6 | 122.5 | 178.1 |
| 100 | 3.1 | -4.6 | -3.1 | 3.3 | -8.7 | -4.3 | 3.1 | -7.1 | -3.2 | 32.6 | -61.9 |
| 144 | 3.1 | 4.4 | 2.9 | 3.3 | -8.3 | -4.2 | 3.1 | -6.8 | -3.1 | 32.4 | -61.8 |
| 154 | 3.1 | 4.4 | 2.9 | 3.3 | -8.3 | -4.2 | 3.1 | -6.8 | -3.0 | 32.5 | -61.8 |
| 109 | 3.2 | 4.4 | 2.9 | 3.3 | -8.3 | -4.2 | 3.1 | -6.8 | -3.0 | 32.4 | -61.8 |
| 52 | 3.2 | 4.5 | 2.6 | 3.3 | -7.8 | -4.7 | 3.1 | -6.4 | -3.4 | 32.5 | 61.8 |
| 24 | 3.2 | -4.7 | -2.9 | 3.3 | -8.9 | -4.1 | 3.2 | -7.2 | -3.0 | 32.5 | 61.9 |
| 49 | 3.2 | -4.6 | -2.9 | 3.3 | -8.8 | -4.1 | 3.1 | -7.1 | -3.0 | 32.4 | -61.9 |
| 27 | 3.2 | 15.9 | 9.9 | 4.8 | 24.6 | 16.0 | 3.5 | 19.2 | 12.2 | 122.5 | 58.2 |
| 67 | 3.2 | -4.5 | -2.9 | 3.4 | -8.6 | -4.1 | 3.2 | -6.9 | -3.0 | 32.5 | 61.8 |
| 147 | 3.2 | 4.3 | 2.8 | 3.5 | -8.2 | -4.1 | 3.3 | -6.5 | -2.9 | 32.4 | 61.9 |
| 79 | 3.2 | 4.3 | 2.8 | 3.5 | -8.2 | -4.1 | 3.3 | -6.5 | -2.9 | 32.5 | 61.8 |
| 29 | 3.2 | 4.4 | 2.7 | 3.4 | -8.2 | -4.3 | 3.2 | -6.7 | -3.1 | 32.4 | 61.9 |
| 8 | 3.3 | 15.6 | 9.6 | 5.0 | 24.2 | 15.6 | 3.6 | 18.8 | 11.9 | 122.5 | 58.1 |
| 88 | 3.9 | -10.6 | -5.2 | 4.6 | -20.0 | -8.4 | 4.0 | -14.5 | -6.3 | 32.5 | -78.2 |
| 121 | 3.9 | -10.4 | -5.4 | 4.7 | -19.5 | -8.7 | 4.0 | -14.1 | -6.5 | 32.5 | -78.2 |
| 104 | 4.0 | 5.5 | 3.3 | 5.5 | 9.8 | 5.5 | 4.4 | 6.9 | 3.8 | 122.4 | 61.8 |
| 93 | 4.0 | 5.5 | 3.1 | 5.5 | 9.8 | 5.3 | 4.4 | 6.9 | 3.7 | 122.5 | 61.8 |
| 58 | 4.0 | 5.4 | 3.2 | 5.5 | 9.7 | 5.5 | 4.4 | 6.8 | 3.7 | 122.5 | 61.8 |
| 102 | 4.0 | -10.0 | -4.8 | 4.8 | -19.0 | -7.6 | 4.2 | -13.7 | -5.8 | 32.5 | 158.2 |
| 84 | 4.0 | 5.5 | 3.4 | 5.5 | 9.9 | 5.7 | 4.4 | 6.9 | 3.9 | 122.5 | -61.9 |
| 17 | 4.0 | 5.4 | 3.3 | 5.5 | 9.8 | 5.6 | 4.4 | 6.8 | 3.8 | 122.4 | 61.8 |
| ID | 20% gelatin | | | 30% gelatin | | | 40% gelatin | | | Dihedral angles | |
| RMSD | Aa (x10-4) | Ar (x10-4) | RMSD | Aa (x10-4) | Ar (x10-4) | RMSD | Aa (x10-4) | Ar (x10-4) | angle 1 | angle 2 |
| 5 | 4.0 | 5.3 | 3.3 | 5.5 | 9.7 | 5.7 | 4.4 | 6.8 | 3.8 | 122.5 | -61.8 |
| 47 | 4.0 | -9.6 | -5.0 | 4.8 | -18.2 | -7.9 | 4.2 | -13.2 | -5.9 | 32.4 | 158.2 |
| 128 | 4.0 | 5.4 | 3.3 | 5.5 | 9.8 | 5.7 | 4.5 | 6.8 | 3.8 | 122.5 | 61.8 |
| 107 | 4.0 | 5.3 | 3.2 | 5.5 | 9.6 | 5.5 | 4.5 | 6.7 | 3.7 | 122.4 | -61.8 |
| 63 | 4.0 | 5.2 | 3.3 | 5.5 | 9.6 | 5.7 | 4.5 | 6.7 | 3.8 | 122.5 | 61.8 |
| 54 | 4.0 | 5.2 | 2.9 | 5.6 | 9.4 | 4.9 | 4.4 | 6.6 | 3.4 | 122.4 | -61.8 |
| 112 | 4.0 | 5.4 | 3.3 | 5.6 | 9.7 | 5.7 | 4.5 | 6.8 | 3.8 | 122.5 | 61.8 |
| 26 | 4.0 | 5.2 | 3.2 | 5.5 | 9.5 | 5.5 | 4.5 | 6.7 | 3.7 | 122.5 | -61.8 |
| 7 | 4.0 | -10.3 | -5.3 | 4.9 | -19.5 | -8.5 | 4.2 | -14.1 | -6.4 | 32.5 | 158.2 |
| 3 | 4.0 | 5.4 | 3.1 | 5.6 | 9.7 | 5.2 | 4.5 | 6.8 | 3.6 | 122.5 | 61.8 |
| 96 | 4.1 | -10.8 | -5.7 | 5.0 | -20.4 | -9.3 | 4.2 | -14.9 | -6.9 | 32.6 | -78.2 |
| 127 | 4.1 | -9.4 | -5.0 | 5.1 | -18.0 | -8.0 | 4.3 | -13.0 | -6.0 | 32.5 | 158.2 |
| 125 | 4.2 | 5.0 | 2.0 | 6.0 | 9.0 | 4.0 | 4.5 | 6.5 | 3.1 | -57.6 | 61.9 |
| 139 | 4.3 | -9.6 | -4.8 | 5.4 | -18.5 | -7.6 | 4.5 | -13.4 | -5.7 | 32.4 | -78.1 |
| 76 | 4.3 | 5.1 | 2.0 | 6.1 | 9.0 | 3.9 | 4.6 | 6.5 | 3.0 | -57.5 | 61.8 |
| 137 | 4.3 | 5.1 | 2.0 | 6.1 | 9.0 | 3.9 | 4.6 | 6.4 | 3.0 | -57.5 | 61.8 |
| 70 | 4.3 | 5.0 | 2.0 | 6.0 | 9.0 | 3.9 | 4.6 | 6.5 | 3.0 | -57.5 | -61.8 |
| 37 | 4.3 | 5.0 | 1.9 | 6.0 | 8.9 | 3.9 | 4.6 | 6.4 | 3.0 | -57.5 | -61.9 |
| 123 | 4.3 | 5.1 | 2.0 | 6.1 | 9.1 | 3.9 | 4.6 | 6.6 | 3.0 | -57.5 | 61.8 |
| 15 | 4.3 | 5.1 | 2.0 | 6.1 | 9.0 | 4.0 | 4.6 | 6.5 | 3.1 | -57.5 | -61.8 |
| 33 | 4.3 | 5.1 | 1.9 | 6.1 | 9.0 | 3.8 | 4.6 | 6.5 | 3.0 | -57.5 | 61.8 |
| 86 | 4.3 | 5.1 | 1.9 | 6.2 | 9.0 | 3.8 | 4.6 | 6.5 | 3.0 | -57.6 | 61.9 |
| 89 | 4.3 | 4.8 | 1.6 | 6.1 | 8.6 | 3.4 | 4.5 | 6.3 | 2.8 | -57.5 | -61.8 |
| 108 | 4.4 | -6.3 | -3.7 | 5.7 | -12.6 | -5.7 | 4.8 | -10.9 | -5.1 | 32.5 | 78.2 |
| 68 | 4.4 | -5.9 | -3.6 | 5.7 | -11.8 | -5.4 | 4.9 | -10.2 | -4.8 | 32.5 | -158.2 |
| 155 | 4.4 | -6.5 | -3.6 | 5.7 | -12.9 | -5.4 | 4.9 | -11.3 | -5.0 | 32.4 | -158.1 |
| 99 | 4.4 | -6.2 | -3.7 | 5.7 | -12.3 | -5.6 | 4.9 | -10.6 | -5.0 | 32.5 | 78.2 |
| 142 | 4.4 | -6.5 | -3.8 | 5.7 | -12.7 | -5.7 | 4.8 | -11.0 | -5.1 | 32.5 | 78.2 |
| 32 | 4.4 | -5.6 | -3.5 | 5.7 | -11.4 | -5.2 | 4.9 | -9.9 | -4.6 | 32.5 | -158.2 |
| 129 | 4.4 | -5.8 | -3.5 | 5.7 | -11.6 | -5.3 | 4.9 | -10.1 | -4.7 | 32.4 | 78.2 |
| 132 | 4.4 | -5.6 | -3.5 | 5.8 | -11.3 | -5.2 | 4.9 | -9.9 | -4.6 | 32.5 | -158.2 |
| 30 | 4.4 | 18.4 | 11.1 | 8.4 | 26.7 | 17.3 | 5.4 | 21.8 | 13.9 | -147.5 | 178.2 |
| 13 | 4.4 | -6.3 | -3.7 | 5.8 | -12.5 | -5.5 | 4.9 | -10.8 | -4.9 | 32.4 | 78.2 |
| 12 | 4.6 | -4.6 | -3.0 | 6.6 | -8.4 | -4.6 | 4.9 | -6.7 | -3.8 | -147.6 | 61.8 |
| 39 | 4.6 | -4.5 | -3.0 | 6.6 | -8.3 | -4.5 | 4.9 | -6.5 | -3.6 | -147.5 | 61.8 |
| 10 | 4.7 | -4.6 | -3.0 | 6.6 | -8.4 | -4.4 | 4.9 | -6.6 | -3.7 | -147.5 | 61.8 |
| 46 | 4.7 | -4.5 | -2.9 | 6.6 | -8.3 | -4.4 | 5.0 | -6.5 | -3.6 | -147.5 | -61.8 |
| 62 | 4.7 | -4.6 | -2.9 | 6.7 | -8.4 | -4.4 | 5.0 | -6.6 | -3.6 | -147.5 | -61.8 |
| 45 | 4.7 | -4.4 | -2.8 | 6.6 | -8.2 | -4.3 | 5.0 | -6.4 | -3.5 | -147.5 | 61.8 |
| 72 | 4.7 | -4.4 | -2.8 | 6.7 | -8.2 | -4.3 | 5.0 | -6.4 | -3.5 | -147.5 | 61.8 |
| 133 | 4.7 | -4.4 | -2.8 | 6.7 | -8.2 | -4.3 | 5.0 | -6.4 | -3.5 | -147.5 | -61.8 |
| 97 | 4.7 | -4.3 | -2.8 | 6.7 | -8.1 | -4.2 | 5.0 | -6.3 | -3.4 | -147.5 | 61.8 |
| ID | 20% gelatin | | | 30% gelatin | | | 40% gelatin | | | Dihedral angles | |
| RMSD | Aa (x10-4) | Ar (x10-4) | RMSD | Aa (x10-4) | Ar (x10-4) | RMSD | Aa (x10-4) | Ar (x10-4) | angle 1 | angle 2 |
| 95 | 4.7 | -8.5 | -4.1 | 6.2 | -15.8 | -6.2 | 5.2 | -13.1 | -5.4 | 32.5 | 178.2 |
| 22 | 4.7 | -4.2 | -2.6 | 6.7 | -7.8 | -4.0 | 5.1 | -6.0 | -3.2 | -147.6 | 61.9 |
| 91 | 4.8 | -7.2 | -3.7 | 6.4 | -14.0 | -5.7 | 5.4 | -11.5 | -4.7 | 32.4 | 58.2 |
| 64 | 4.8 | -6.8 | -3.6 | 6.4 | -13.4 | -5.4 | 5.4 | -11.0 | -4.5 | 32.5 | 178.2 |
| 14 | 4.9 | -6.5 | -3.6 | 6.5 | -13.1 | -5.6 | 5.4 | -10.8 | -4.6 | 32.4 | 178.1 |
| 38 | 4.9 | -7.0 | -3.6 | 6.5 | -13.7 | -5.5 | 5.4 | -11.2 | -4.6 | 32.4 | 178.1 |
| 50 | 4.9 | -7.4 | -3.6 | 6.5 | -14.0 | -5.5 | 5.4 | -11.5 | -4.6 | 32.5 | 58.2 |
| 131 | 4.9 | 18.0 | 10.9 | 9.1 | 25.7 | 16.6 | 6.0 | 21.3 | 13.6 | -147.5 | -58.3 |
| 153 | 5.0 | -19.7 | -12.8 | 7.7 | -32.3 | -20.3 | 6.1 | -23.1 | -14.8 | 122.5 | 158.2 |
| 149 | 5.0 | -19.7 | -12.7 | 7.7 | -32.2 | -20.1 | 6.1 | -23.0 | -14.6 | 122.5 | 158.2 |
| 81 | 5.0 | 11.4 | 7.1 | 7.7 | -14.5 | -9.1 | 5.8 | -14.3 | -9.5 | -147.6 | 58.1 |
| 85 | 5.1 | -19.7 | -12.6 | 7.8 | -32.3 | -20.0 | 6.2 | -22.8 | -14.5 | 122.5 | 158.2 |
| 158 | 5.1 | 8.9 | 5.7 | 8.0 | -11.8 | -6.9 | 6.1 | -10.9 | -6.9 | -119.0 | 178.7 |
| 11 | 5.1 | 10.5 | 6.6 | 7.8 | -13.3 | -8.1 | 5.9 | -13.4 | -8.7 | -147.6 | 178.2 |
| 61 | 5.2 | -18.6 | -11.9 | 7.9 | -30.6 | -18.8 | 6.3 | -21.7 | -13.6 | 122.4 | -78.1 |
| 44 | 5.2 | -18.6 | -11.9 | 8.0 | -30.7 | -19.0 | 6.3 | -21.6 | -13.7 | 122.4 | -78.2 |
| 156 | 5.2 | -20.0 | -13.0 | 8.1 | -32.5 | -20.6 | 6.3 | -23.3 | -15.0 | 122.4 | -78.2 |
| 28 | 5.2 | 9.2 | 5.9 | 7.9 | -11.7 | -6.7 | 6.0 | -12.0 | -7.6 | -147.5 | 178.2 |
| 31 | 5.2 | -18.7 | -12.0 | 8.1 | -30.8 | -19.1 | 6.3 | -21.8 | -13.8 | 122.5 | -78.2 |
| 116 | 5.3 | -8.0 | -5.3 | 8.0 | -10.3 | -5.3 | 6.1 | -10.8 | -6.5 | -147.6 | 178.2 |
| 94 | 5.3 | 4.9 | 1.8 | 7.6 | 7.5 | 3.0 | 5.8 | 6.7 | 3.3 | -57.5 | 78.1 |
| 152 | 5.3 | -18.5 | -11.8 | 8.2 | -30.6 | -18.9 | 6.4 | -21.5 | -13.6 | 122.5 | -78.2 |
| 60 | 5.3 | -7.0 | -4.4 | 8.0 | -9.0 | -3.9 | 6.2 | -9.6 | -5.4 | -147.5 | 178.2 |
| 105 | 5.3 | 4.8 | 1.7 | 7.7 | 7.3 | 2.8 | 5.9 | 6.6 | 3.2 | -57.5 | 78.2 |
| 83 | 5.3 | 8.0 | 5.2 | 8.1 | -9.9 | -5.2 | 6.2 | -10.7 | -6.6 | -147.6 | 178.2 |
| 87 | 5.3 | 4.6 | 1.6 | 7.7 | 7.1 | 2.6 | 5.9 | 6.4 | 3.1 | -57.6 | -158.2 |
| 135 | 5.3 | 4.6 | 1.6 | 7.7 | 7.1 | 2.6 | 5.9 | 6.5 | 3.1 | -57.5 | -158.2 |
| 4 | 5.4 | 4.7 | 1.6 | 7.7 | 7.2 | 2.7 | 5.9 | 6.5 | 3.2 | -57.5 | -158.2 |
| 130 | 5.4 | 4.6 | 1.7 | 7.7 | 7.0 | 2.5 | 5.9 | 6.5 | 3.2 | -57.5 | -158.2 |
| 9 | 5.4 | 4.8 | 1.7 | 7.7 | 7.3 | 2.7 | 5.9 | 6.6 | 3.2 | -57.5 | 78.1 |
| 66 | 5.4 | 4.6 | 1.7 | 7.7 | 7.0 | 2.5 | 5.9 | 6.5 | 3.3 | -57.6 | -158.2 |
| 103 | 5.4 | -17.9 | -11.4 | 8.4 | -29.7 | -18.2 | 6.5 | -20.8 | -13.1 | 122.4 | -78.2 |
| 77 | 5.4 | 4.7 | 1.8 | 7.8 | 7.1 | 2.7 | 6.0 | 6.5 | 3.3 | -57.6 | -158.2 |
| 48 | 5.4 | 4.8 | 1.8 | 7.8 | 7.2 | 2.8 | 5.9 | 6.6 | 3.4 | -57.5 | -158.2 |
| 21 | 5.6 | 5.6 | 2.5 | 7.8 | 9.8 | 4.2 | 6.0 | 8.3 | 4.4 | -57.6 | 58.2 |
| 82 | 5.6 | 5.7 | 2.5 | 7.9 | 9.8 | 4.4 | 6.0 | 8.3 | 4.4 | -57.5 | 58.1 |
| 59 | 5.6 | -5.2 | -2.6 | 8.6 | -6.1 | -1.1 | 6.6 | -7.8 | -3.6 | -147.5 | 78.2 |
| 53 | 5.6 | -4.7 | -2.2 | 8.6 | -5.5 | -0.9 | 6.6 | -7.0 | -2.9 | -147.5 | 158.2 |
| 35 | 5.6 | -4.6 | -2.2 | 8.6 | -5.5 | -0.8 | 6.6 | -7.0 | -3.0 | -147.5 | 78.2 |
| 73 | 5.7 | -5.2 | -2.7 | 8.6 | -6.1 | -1.1 | 6.6 | -7.8 | -3.6 | -147.6 | -158.1 |
| 138 | 5.7 | -5.1 | -2.5 | 8.6 | -5.8 | -1.0 | 6.6 | -7.6 | -3.5 | -147.6 | -158.2 |
| 25 | 5.7 | -5.6 | -3.0 | 8.6 | -6.5 | -1.5 | 6.6 | -8.3 | -4.0 | -147.6 | 78.1 |
| ID | 20% gelatin | | | 30% gelatin | | | 40% gelatin | | | Dihedral angles | |
| RMSD | Aa (x10-4) | Ar (x10-4) | RMSD | Aa (x10-4) | Ar (x10-4) | RMSD | Aa (x10-4) | Ar (x10-4) | angle 1 | angle 2 |
| 151 | 5.7 | -5.3 | -2.7 | 8.6 | -6.0 | -1.2 | 6.6 | -7.9 | -3.7 | -147.6 | -158.2 |
| 150 | 5.7 | -13.1 | -6.4 | 8.9 | -23.3 | -10.0 | 6.4 | -17.7 | -8.0 | 32.5 | -58.2 |
| 92 | 5.7 | -4.3 | -1.9 | 8.6 | -5.0 | -1.0 | 6.7 | -6.5 | -2.6 | -147.5 | -158.2 |
| 106 | 5.7 | -4.2 | -1.9 | 8.6 | -4.9 | -1.1 | 6.7 | -6.5 | -2.6 | -147.6 | -158.2 |
| 69 | 5.7 | -13.4 | -6.7 | 9.0 | -23.8 | -10.6 | 6.5 | -18.1 | -8.4 | 32.5 | -58.2 |
| 80 | 5.8 | 5.2 | 2.0 | 8.2 | 9.0 | 3.9 | 6.3 | 7.6 | 3.8 | -57.6 | 178.2 |
| 51 | 5.8 | 5.1 | 2.0 | 8.2 | 9.1 | 3.9 | 6.3 | 7.6 | 3.8 | -57.5 | 58.1 |
| 40 | 6.0 | 14.2 | 8.7 | 10.5 | -19.0 | -12.6 | 7.2 | 16.7 | 11.0 | -147.5 | -58.2 |
| 23 | 6.0 | -12.1 | -6.0 | 9.4 | -21.8 | -9.4 | 6.8 | -16.6 | -7.5 | 32.5 | 178.2 |
| 115 | 6.0 | -12.2 | -6.6 | 9.6 | -21.6 | -10.4 | 6.9 | -16.7 | -8.4 | 32.5 | 178.2 |
| 101 | 6.0 | 6.4 | 3.0 | 9.2 | 12.5 | 6.9 | 6.9 | 9.3 | 5.3 | -57.6 | 158.2 |
| 143 | 6.1 | 6.1 | 2.7 | 9.3 | 11.9 | 6.4 | 7.0 | 8.8 | 4.9 | -57.5 | 158.2 |
| 56 | 6.1 | 6.6 | 3.2 | 9.4 | 13.1 | 7.3 | 7.0 | 9.6 | 5.6 | -57.5 | -78.2 |
| 75 | 6.1 | 6.1 | 2.8 | 9.5 | 12.1 | 6.6 | 7.0 | 8.8 | 5.0 | -57.5 | -78.1 |
| 114 | 6.1 | 6.4 | 3.2 | 9.6 | 12.5 | 7.0 | 7.0 | 9.3 | 5.4 | -57.5 | -78.2 |
| 118 | 6.1 | 6.2 | 2.8 | 9.4 | 12.2 | 6.6 | 7.1 | 9.0 | 5.1 | -57.5 | -78.2 |
| 42 | 6.4 | 12.5 | 7.7 | 11.2 | -15.8 | -10.3 | 7.8 | 14.8 | 9.8 | -147.5 | -58.1 |
| 157 | 6.5 | -8.8 | -5.7 | 10.4 | -14.3 | -8.2 | 7.9 | -9.8 | -5.9 | 118.7 | 178.5 |
| 55 | 6.6 | -12.3 | -7.7 | 10.7 | -20.6 | -11.6 | 8.0 | -13.9 | -8.2 | 122.4 | 178.2 |
| 41 | 6.6 | -12.3 | -7.7 | 10.7 | -20.5 | -11.5 | 8.1 | -13.8 | -8.2 | 122.5 | 178.2 |
| 1 | 6.6 | -12.0 | -7.7 | 10.7 | -20.2 | -11.5 | 8.1 | -13.6 | -8.2 | 122.4 | -58.2 |
| 110 | 6.6 | -12.0 | -7.7 | 10.7 | -20.1 | -11.5 | 8.1 | -13.6 | -8.2 | 122.4 | -58.2 |
| 140 | 6.7 | -11.5 | -7.3 | 10.9 | -19.1 | -11.0 | 8.2 | -13.0 | -7.8 | 122.5 | 178.2 |
| 6 | 6.8 | -10.3 | -6.7 | 11.1 | -17.2 | -10.0 | 8.3 | -11.4 | -7.0 | 122.5 | -58.2 |
| 78 | 6.8 | -9.8 | -6.5 | 11.2 | -16.4 | -9.6 | 8.3 | -10.8 | -6.7 | 122.5 | -58.2 |
| 119 | 6.9 | 9.0 | 5.9 | 11.3 | -14.7 | -8.8 | 8.4 | -9.9 | -6.2 | 122.4 | -58.2 |
| 43 | 7.0 | 4.5 | 2.6 | 11.3 | -9.0 | -6.0 | 8.2 | -6.9 | -4.4 | 57.6 | 178.2 |
| 2 | 7.0 | 4.5 | 2.6 | 11.3 | 9.1 | 6.0 | 8.2 | -6.9 | -4.5 | -57.5 | 178.2 |
| 122 | 7.0 | 4.9 | 2.9 | 11.3 | -9.8 | -6.4 | 8.2 | -7.4 | -4.8 | -57.5 | 178.1 |
| 18 | 7.0 | 4.3 | 2.5 | 11.3 | -8.6 | -5.7 | 8.3 | -6.6 | -4.2 | -57.5 | 178.2 |
| 19 | 7.0 | 4.6 | 2.6 | 11.3 | -9.2 | -6.1 | 8.3 | -7.0 | -4.5 | -57.6 | -58.1 |
| 136 | 7.1 | 4.4 | 2.6 | 11.4 | -9.0 | -5.8 | 8.3 | -6.8 | -4.3 | -57.4 | -58.2 |
| 141 | 7.1 | 3.9 | 2.4 | 11.5 | -7.8 | -5.0 | 8.3 | -6.2 | -3.8 | -57.5 | -58.2 |
| 74 | 7.1 | 3.8 | 2.4 | 11.5 | -7.8 | -4.9 | 8.3 | -6.2 | -3.7 | -57.5 | -58.2 |
| 113 | 7.1 | 4.2 | 2.5 | 11.4 | -8.6 | -5.5 | 8.3 | -6.6 | -4.1 | -57.5 | -58.2 |

1H (ppm)

Figure 1 1H spectrum of carnosine in solution.

Figure 2 1H spectrum of carnosine in unstretched 20% gelatin

1H (ppm)

1H (ppm)

Fig 3 1H spectrum of carnosine in stretched 20% gelatin

1H (ppm)

Figure 4 1H spectrum of carnosine in unstretched 30% gelatin

1H (ppm)

Figure 5 1H spectrum of carnosine in stretched 30% gelatin

1H (ppm)

Figure 6 1H spectrum of carnosine in unstretched 40% gelatin

1H (ppm)

Figure 7 1H spectrum of carnosine in stretched 40% gelatin

Figure 8 P.E:HSQC spectrum of isotropic 20% gelatin.

1H (ppm)

13C
(ppm)

1H (ppm)

13C
(ppm)

Figure. 9 P.E.HSQC spectrum of stretched 20% gelatin.

1H (ppm)

13C
(ppm)

Figure 10 P.E.HSQC spectrum of isotropic 30% gelatin.

1H (ppm)

13C
(ppm)

Figure 11 P.E.HSQC spectrum of stretched 30% gelatin.

1H (ppm)

13C
(ppm)

Figure 12 P.E.HSQC spectrum of isotropic 40% gelatin.

1H (ppm)

13C
(ppm)

Figure 13 P.E.HSQC spectrum of stretched 40% gelatin.

**References:**

[1] Bolton E. Wang Y. Thiessen PA. Bryant SH (2008) PubChem: Integrated Platform of Small Molecules and Biological Activities. Chapter 12 in: Wheeler R. Spellmeyer D (ed) Annual Reports in Computational Chemistry. Volume 4. American Chemical Society. Washington

[2] Itoh H. Yamane T. Ashida T. Kukado M (1977) Carnosine (β-Alanyl-L-histidine). Acta Crystallogr Sect B Struct Sci 33:2959
